# Supplementary material for: p53-Induced LINC00893 Regulates RBFOX2 Stability to Suppress Gastric Cancer Progression
Source: Front Cell Dev Biol. 2022 Jan 19;9:796451. doi: 10.3389/fcell.2021.796451 (PMC8807521; doi:10.3389/fcell.2021.796451)
Supplement: Supplementary file 4 [file Table4.xlsx]

## Sheet: Table S4
Table S4
RBP	geneID	geneName	geneType	clusterNum	clipExpNum	clipIDnum
U2AF2	ENSG00000241769	LINC00893	antisense	43	9	67
HNRNPA2B1	ENSG00000241769	LINC00893	antisense	25	6	36
HNRNPC	ENSG00000241769	LINC00893	antisense	14	7	30
EIF4A3	ENSG00000241769	LINC00893	antisense	17	2	25
CSTF2T	ENSG00000241769	LINC00893	antisense	19	5	24
DDX54	ENSG00000241769	LINC00893	antisense	10	5	18
RBFOX2	ENSG00000241769	LINC00893	antisense	12	7	18
TAF15	ENSG00000241769	LINC00893	antisense	14	5	17
PRPF8	ENSG00000241769	LINC00893	antisense	13	4	16
HNRNPK	ENSG00000241769	LINC00893	antisense	9	5	15
FUS	ENSG00000241769	LINC00893	antisense	9	3	14
GTF2F1	ENSG00000241769	LINC00893	antisense	13	3	14
SRSF1	ENSG00000241769	LINC00893	antisense	8	4	13
NUMA1	ENSG00000241769	LINC00893	antisense	9	2	12
FAM120A	ENSG00000241769	LINC00893	antisense	9	3	11
HNRNPA1	ENSG00000241769	LINC00893	antisense	10	2	11
DGCR8	ENSG00000241769	LINC00893	antisense	7	4	9
ELAVL1	ENSG00000241769	LINC00893	antisense	8	2	9
HNRNPU	ENSG00000241769	LINC00893	antisense	8	3	9
U2AF1	ENSG00000241769	LINC00893	antisense	8	2	9
ZNF184	ENSG00000241769	LINC00893	antisense	7	2	9
FBL	ENSG00000241769	LINC00893	antisense	8	2	8
NOP58	ENSG00000241769	LINC00893	antisense	7	2	7
RNF219	ENSG00000241769	LINC00893	antisense	6	1	6
AIFM1	ENSG00000241769	LINC00893	antisense	5	1	5
FMR1	ENSG00000241769	LINC00893	antisense	5	2	5
PCBP2	ENSG00000241769	LINC00893	antisense	4	2	5
SAFB2	ENSG00000241769	LINC00893	antisense	5	2	5
BCCIP	ENSG00000241769	LINC00893	antisense	4	2	4
ILF3	ENSG00000241769	LINC00893	antisense	2	2	4
SRSF7	ENSG00000241769	LINC00893	antisense	3	2	4
BUD13	ENSG00000241769	LINC00893	antisense	3	1	3
IGF2BP2	ENSG00000241769	LINC00893	antisense	3	2	3
PTBP1	ENSG00000241769	LINC00893	antisense	3	2	3
SF3B4	ENSG00000241769	LINC00893	antisense	2	2	3
CBX7	ENSG00000241769	LINC00893	antisense	1	2	2
DDX3X	ENSG00000241769	LINC00893	antisense	2	2	2
HNRNPM	ENSG00000241769	LINC00893	antisense	2	1	2
MSI1	ENSG00000241769	LINC00893	antisense	2	1	2
TIA1	ENSG00000241769	LINC00893	antisense	2	2	2
UPF1	ENSG00000241769	LINC00893	antisense	2	2	2
ADAR	ENSG00000241769	LINC00893	antisense	1	1	1
CELF2	ENSG00000241769	LINC00893	antisense	1	1	1
CNBP	ENSG00000241769	LINC00893	antisense	1	1	1
CPSF6	ENSG00000241769	LINC00893	antisense	1	1	1
DKC1	ENSG00000241769	LINC00893	antisense	1	1	1
FTO	ENSG00000241769	LINC00893	antisense	1	1	1
IGF2BP3	ENSG00000241769	LINC00893	antisense	1	1	1
KHDRBS1	ENSG00000241769	LINC00893	antisense	1	1	1
KHSRP	ENSG00000241769	LINC00893	antisense	1	1	1
LIN28	ENSG00000241769	LINC00893	antisense	1	1	1
MBNL1	ENSG00000241769	LINC00893	antisense	1	1	1
RANGAP1	ENSG00000241769	LINC00893	antisense	1	1	1
RBM10	ENSG00000241769	LINC00893	antisense	1	1	1
SF3A3	ENSG00000241769	LINC00893	antisense	1	1	1
SLTM	ENSG00000241769	LINC00893	antisense	1	1	1
TARDBP	ENSG00000241769	LINC00893	antisense	1	1	1
TRA2A	ENSG00000241769	LINC00893	antisense	1	1	1
VIM	ENSG00000241769	LINC00893	antisense	1	1	1
YTHDF1	ENSG00000241769	LINC00893	antisense	1	1	1
